# Supplementary material for: GSDMs are potential therapeutic targets and prognostic biomarkers in clear cell renal cell carcinoma
Source: publisher site journal article supplement (doi:10.18632/aging.203973), 2022-03-23
Supplement: Supplementary file [file aging-v14i6-203973-supplementary-material-SD1.pdf]

**SUPPLEMENTARY FIGURE**

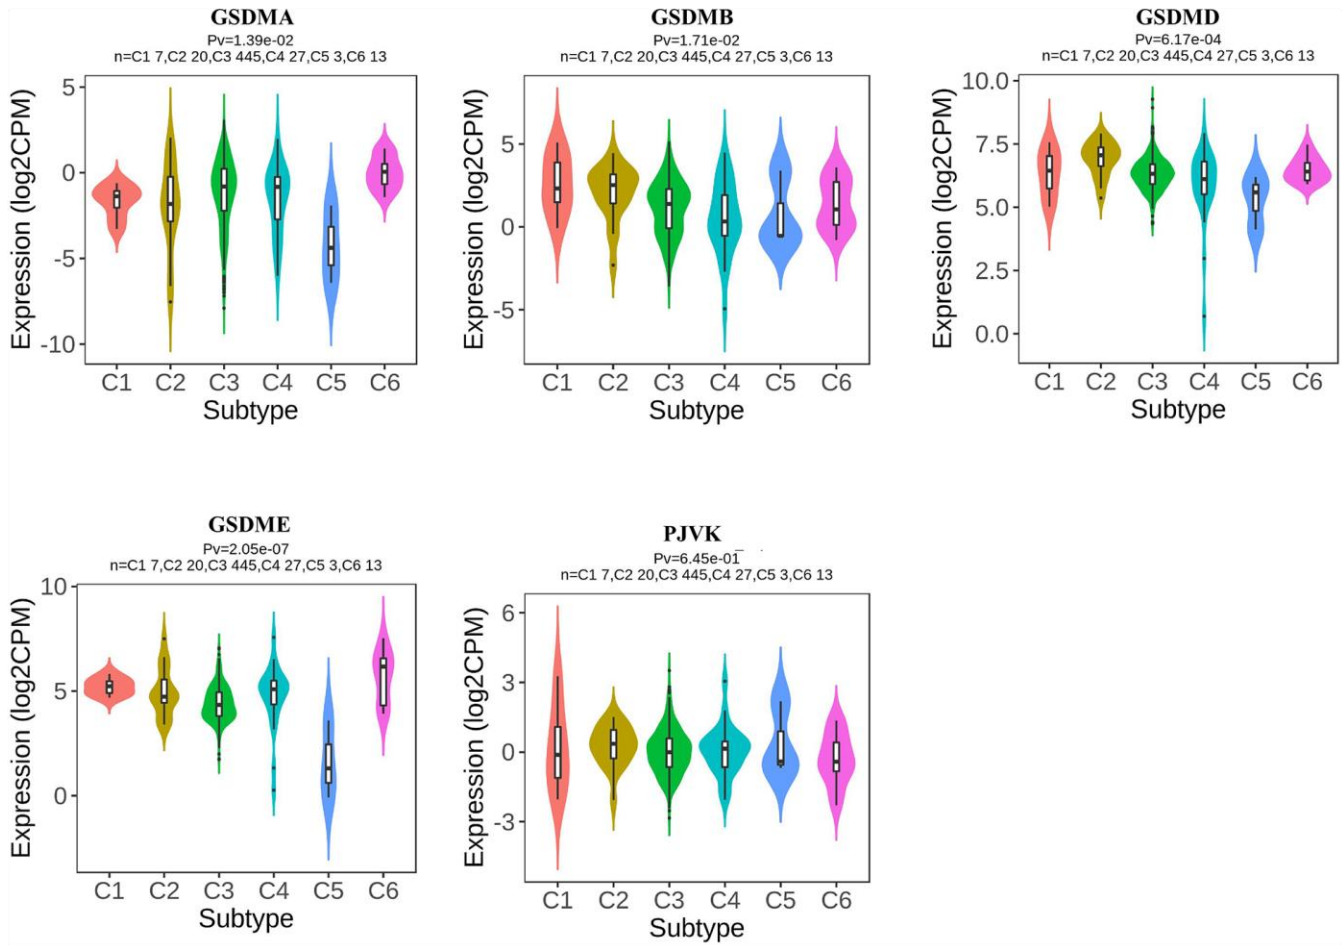

Supplementary Figure 1. The relationship between GSDM molecules' expression and ccRCC immune subtypes, including wound healing (C1), IFN-gamma dominant (C2), inflammatory (C3), lymphocyte depleted (C4), immunologically quiet (C5) and TGF-β dominant (C6) (TISIDB).
